# Supplementary material for: Assessment of Dasatinib Versus Nilotinib as Upfront Therapy for Chronic Phase of Chronic Myeloid Leukemia in Qatar: A Cost-Effectiveness Analysis
Source: PubMed Central journal article supplement — Cancer Control. 2021 Apr 23;28:10732748211001796. doi: 10.1177/10732748211001796 (PMC8204580; doi:10.1177/10732748211001796), 2021-04-23
Supplement: sj-pdf-1-ccx-10.1177_10732748211001796.pdf [file sj-pdf-1-ccx-10.1177_10732748211001796.pdf]

## **Assessment of Dasatinib versus Nilotinib as Upfront Therapy for Chronic-Phase of Chronic Myeloid Leukemia in Qatar: A Cost Effectiveness Analysis**

Highlights:

### **What do we already know about this topic?**

The goals for standard treatment for CML-CP using TKIs such as nilotinib, dasatinib has well been established to achieve clinical remission while optimizing patient's quality of life.

### **How does your research contribute to the Cancer Control field?**

Upfront therapy of chronic myeloid leukemia –chronic phase patients by nilotinib plan appears to be more cost-effective than dasatinib i.e. more cost-effective strategy in terms of incremental costs per additional MMR/CCyR response gained.

### **What are your research's implications towards theory, practice, or policy?**

The main finding identified will provide clinicians and healthcare policy makers in Qatar with better CML treatment decision making.
